# Supplementary material for: Structural and Photoelectronic Properties of κ-Ga2O3 Thin Films Grown on Polycrystalline Diamond Substrates
Source: MDPI journal article supplement (doi:10.3390/ma17020519), 2024-01-22
Supplement: s1 [file s1]

## Structural and photoelectronic properties of $\kappa$ -Ga<sub>2</sub>O<sub>3</sub> thin films grown on polycrystalline diamond substrates

Marco Girolami, Matteo Bosi, Sara Pettinato, Claudio Ferrari, Riccardo Lolli, Luca Seravalli, Valerio Serpente, Matteo Mastellone, Daniele M. Trucchi and Roberto Fornari

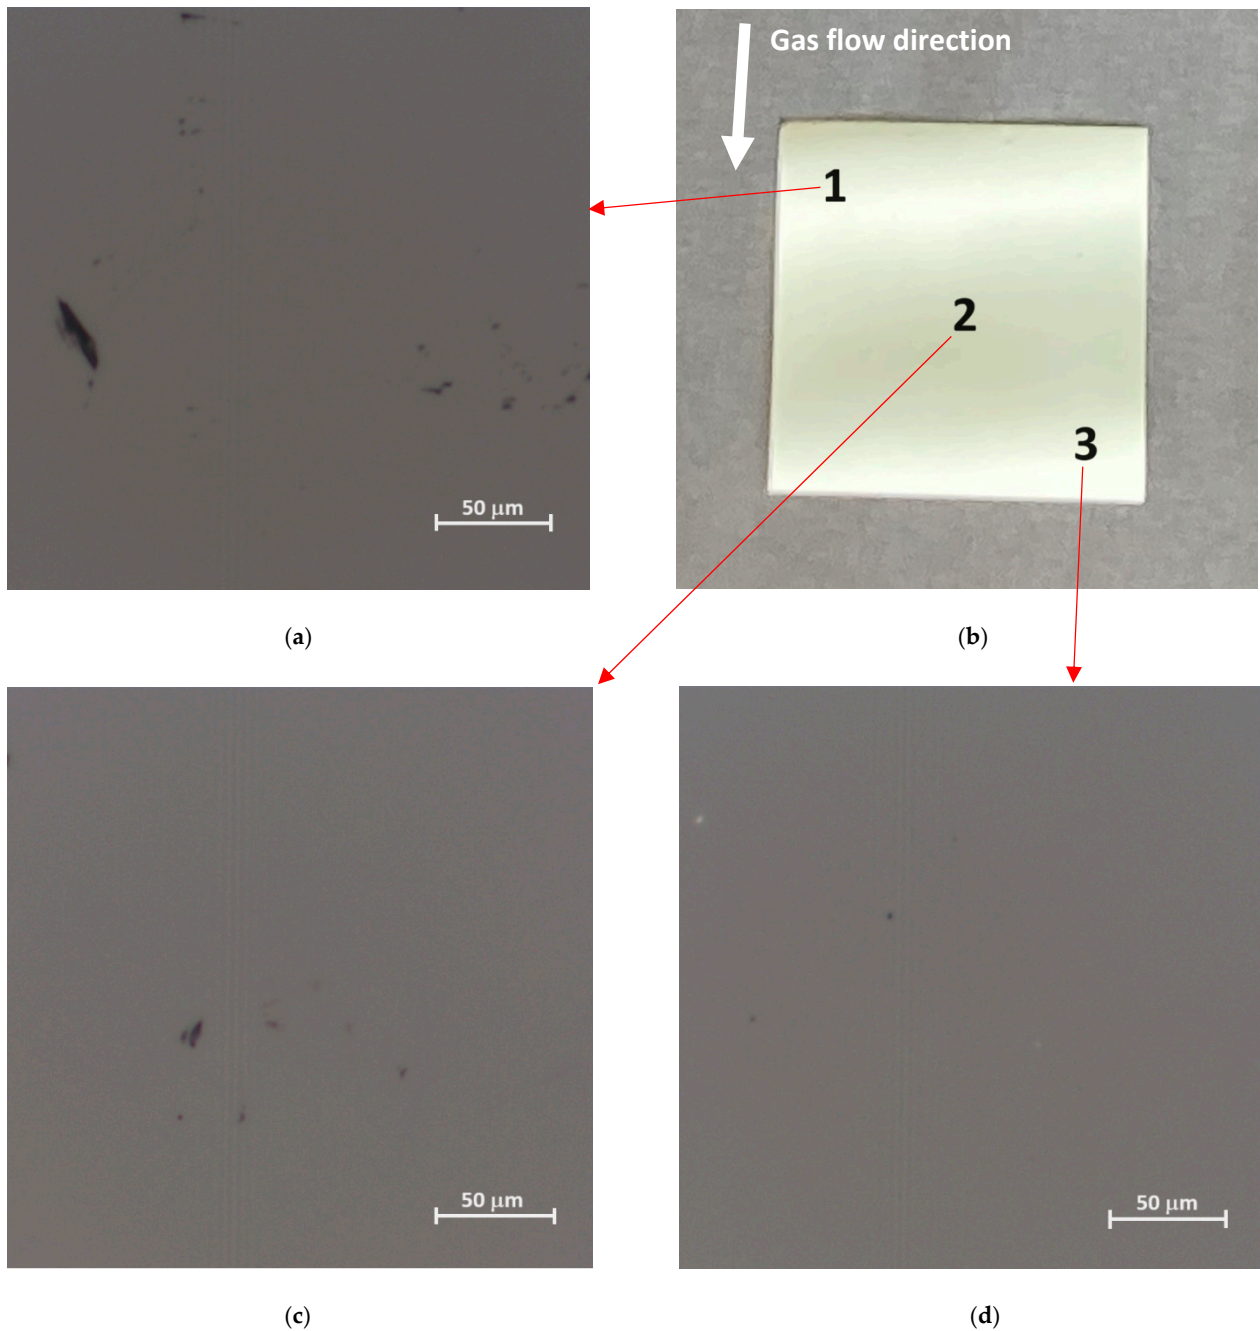

**Figure S1.** Optical microscopy images of the surface of the slow-cooled sample: (a) details of zone 1; (b) overall view of the 10 × 10 mm<sup>2</sup> surface; (c) details of zone 2; (d) details of zone 3. All the three zones have a mirror-like appearance.
